1 **EvolvingSTEM: A microbial evolution-in-action curriculum that enhances learning**  
2 **of evolutionary biology and biotechnology**

3

4 Vaughn S. Cooper<sup>1,2,3,5</sup>, Taylor M. Warren<sup>3</sup>, Abigail M. Matela<sup>1,2</sup>, Michael Handwork<sup>4</sup>,  
5 Shani Scarponi<sup>4</sup>

6

7 1: Department of Microbiology and Molecular Genetics, and 2: Center for Evolutionary  
8 Biology and Medicine, University of Pittsburgh, School of Medicine, Pittsburgh, PA USA

9

10 3: Department of Molecular, Cellular, and Biomedical Sciences, University of New  
11 Hampshire, Durham, NH USA

12

13 4: Winnacunnet High School, Hampton, NH USA

14

15 5: Corresponding author: [vaughn.cooper@pitt.edu](mailto:vaughn.cooper@pitt.edu)

16

17

18

19 **Abstract**

20

21 Evolution is a central, unifying theory for all of life science, yet the subject is  
22 poorly represented in most secondary-school biology courses, especially in the United  
23 States. One challenge to learning evolution is that it is taught as a conceptual,  
24 retrospective subject with few tangible outcomes for students. These typical passive  
25 learning strategies lead to student disengagement with the material and  
26 misunderstanding of evolutionary concepts. To promote greater investment and  
27 comprehension, we developed EvolvingSTEM, an inquiry-based laboratory curriculum  
28 that demonstrates concepts of natural selection, heredity, and ecological diversity  
29 through experimental evolution of a benign bacterium. Students transfer populations of  
30 *Pseudomonas fluorescens* growing on plastic beads, which selects for biofilm formation  
31 and mutants with new, conspicuous phenotypes. We introduced our curriculum to four  
32 introductory high school biology classes alongside their standard curriculum materials  
33 and found that students who learned evolution through EvolvingSTEM scored  
34 significantly better on a common assessment targeted to Next Generation Science  
35 Standards than students taught only the standard curriculum. This latter group  
36 subsequently achieved similar scores once they too completed our curriculum. Our work  
37 demonstrates that inquiry-based, hands-on experiences with evolving bacterial  
38 populations can greatly enhance student learning of evolutionary concepts.

39

## 40 **Introduction**

41           Understanding evolutionary processes is fundamental to all areas of life science  
42 because evolution serves as a conceptual framework to organize other life science  
43 topics, such as organismal diversity and ecological interactions. Furthermore, some of  
44 the most significant threats to human health are evolutionary phenomena; therefore,  
45 knowledge of evolutionary processes has a direct impact on public health and medicine  
46 (Wells et al. 2017). For example, antimicrobial resistance and cancer are caused by the  
47 rapid evolution of microbes and our own cells, respectively (Karatan and Watnick 2009;  
48 Greaves and Maley 2012; Berendonk et al. 2015; Makohon-Moore and Iacobuzio-  
49 Donahue 2016; Alizon and Méthot 2018). In addition, ongoing revolutions in  
50 biotechnology and personalized medicine, such as gene-editing (i.e., CRISPR), can  
51 only be understood in the context of the evolutionary concept of descent from a shared  
52 ancestral lineage (Makarova et al. 2015; Knott and Doudna 2018). A strong knowledge  
53 base of evolution is therefore invaluable for a literate society to understand scientific  
54 and medical advances and for a prepared workforce to excel in jobs in science,  
55 technology, and engineering. The value of evolutionary biology knowledge is highlighted  
56 by its inclusion as a core concept for STEM education practices (National Research  
57 Council 2012; NGSS Lead States 2013; NSTA 2013).

58  
59           Although the importance of evolutionary biology is well-established,  
60 misconceptions of its basic principles remain prevalent among students, the general  
61 public, and even the teachers who are providing instruction (Cunningham and Wescott  
62 2009; Gregory 2009; Sickel and Friedrichsen 2013; Yates and Marek 2014; Glaze and  
63 Goldston 2015). While many concurrent factors likely contribute to poor understanding  
64 (Smith 2010a; 2010b; Pobiner 2016), one potential reason that evolutionary concepts  
65 are misunderstood is that typical curricula use passive learning strategies, where  
66 instruction relies on lectures and textbook readings. Current evolution curriculum design  
67 runs counter to evidence that student-centered, active learning strategies are the most  
68 effective method for science teaching and have been shown to improve student  
69 understanding of evolutionary concepts (Nehm and Reilly 2007; Nelson 2008; Freeman  
70 et al. 2014; Romine et al. 2017). Courses that provide students with authentic research

71 experiences are especially effective at increasing student engagement and promoting a  
72 deeper understanding of evolution (Jordan et al. 2014; Ratcliff et al. 2014; Broder et al.  
73 2018).

74

75         There is therefore a critical need for engaging and informative evolutionary  
76 biology curricula that provide K-12 students the opportunity to explore the concept of  
77 changing frequencies of inherited traits just as they attempt to quantify gravity in physics  
78 or acid-base reactions in chemistry. To meet this need, we developed EvolvingSTEM, a  
79 curriculum that provides inquiry-based learning of evolution, microbiology, ecology, and  
80 heredity with a laboratory experiment that employs real scientific research practices.  
81 EvolvingSTEM allows students to visualize evolutionary adaptations arising in real time  
82 by growing populations of the harmless bacterium *Pseudomonas fluorescens* under  
83 conditions that select for the formation of a biofilm. A biofilm is a surface dwelling  
84 community of microbes encased in a protective coating of self-produced polymers;  
85 biofilms are the dominant form of microbial life (Costerton et al. 1987). They are also  
86 structured, heterogeneous environments that include varied ecological niches (Karatan  
87 and Watnick 2009). Bacteria with advantageous mutations colonize these niches, and  
88 their adaptations cause visible differences in colony morphology from the ancestral  
89 genotype (Rainey and Travisano 1998; Flynn et al. 2016). This evolution-in-action  
90 occurs within days, requires little specialized equipment, and can be offered in any  
91 classroom laboratory that can support sterile technique. Our curriculum is intended to  
92 replace standard, passive learning curricula to meet competencies for natural selection  
93 and evolution described in the Next-Generation Science Standards (HS-LS4, (NGSS  
94 Lead States 2013)). We hypothesized that students who learn evolutionary concepts  
95 with our curriculum would have significant increases in content knowledge relative to  
96 students that were provided only the standard curriculum.

97

98

## 99 Results

### 100 ***Developing and refining an amenable protocol for teaching bacterial evolution to*** 101 ***high school students***

102 The idea to teach evolutionary concepts to high school students with a bacterial  
103 evolution experiment grew from our research on identifying the causes of rapidly  
104 evolving mutant colony morphologies of the opportunistic pathogens *Burkholderia*  
105 *cenocepacia* and *Pseudomonas aeruginosa* (Poltak and Cooper 2011; Flynn et al.  
106 2016). These species are particularly threatening to persons with cystic fibrosis, where  
107 they cause chronic airway infections by forming biofilms (Starkey et al. 2009; Ashish et  
108 al. 2013). Biofilm-associated infections are inherently more resistant to host immunity  
109 and antimicrobials because secreted adhesive polymers are protective and the cells  
110 within grow more slowly (Harrison et al. 2005). Eventually, some bacteria disperse from  
111 the colony, either as individuals or clusters, to inhabit new surfaces and resume the  
112 biofilm lifecycle (Poltak and Cooper 2011; Martin et al. 2016).

113  
114 In order to study the dynamics of bacterial evolution *in vitro*, we developed a  
115 simple method to model the biofilm lifecycle of surface attachment, biofilm formation,  
116 dispersal, and recolonization (Figure 1, (Poltak and Cooper 2011; Traverse et al. 2013;  
117 O'Rourke et al. 2015; Flynn et al. 2016; Turner et al. 2018). In short, we culture bacteria  
118 for 24 hours in test tubes containing growth media and a polystyrene bead. A subset of  
119 the bacteria colonize the bead and form a biofilm. We then transfer only the biofilm-  
120 covered bead to a new tube with a fresh bead. We repeat this process daily to select for  
121 bacterial mutants that are best adapted to aspects of the entire biofilm lifecycle.  
122 Conveniently, we found that biofilm adapted mutants also display altered colony  
123 morphologies when grown on agar plates, making them conspicuous to students.

124  
125 In collaboration with science teachers and administrators at Winnacunnet High  
126 School (Hampton, NH), we modified our research laboratory protocol to accommodate  
127 implementation in a high school classroom. We selected the plant probiotic bacterium,  
128 *Pseudomonas fluorescens* SBW25, as our study subject because it had several  
129 qualities that made it a good candidate for use in a high school classroom: (1) it is

130 benign, and thus safe for students with no microbiology experience, (2) it had previously  
131 been suggested as a good candidate for use in educational settings (Green et al. 2011;  
132 Spiers 2014), and (3) it is the subject of a large body of research on its capacity for  
133 rapid and conspicuous adaptive evolution in biofilm-related conditions (Rainey and  
134 Travisano 1998; Spiers 2005). Adaptive *P. fluorescens* mutants are often characterized  
135 by rugose or rosette-like colony morphologies resulting from greater production of  
136 polysaccharides for attachment (Rainey et al. 2000). We found that experimental  
137 evolution of *P. fluorescens* SBW25 in the biofilm lifecycle model selected for a high  
138 frequency of adaptive mutants with novel colony morphologies in less than two weeks.

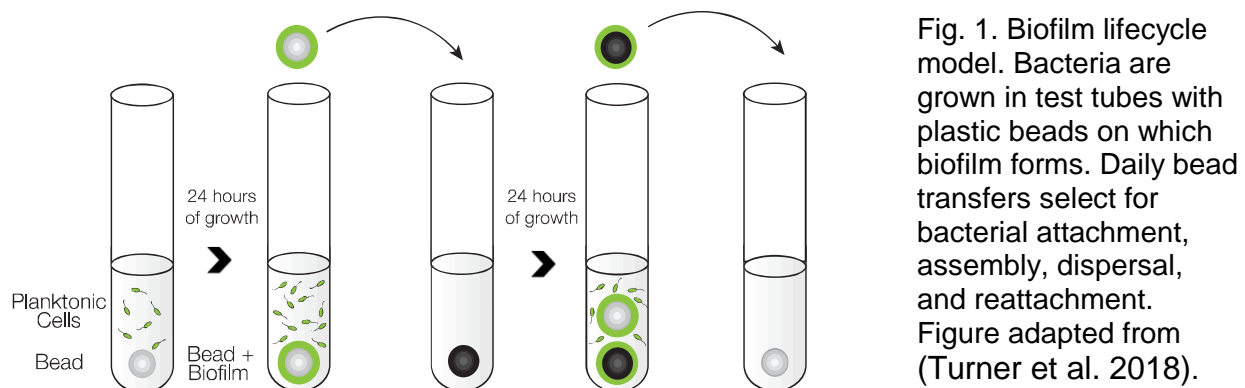

139

140

141 To accelerate this process and ensure that our experiment could be performed  
142 within the timeframe of a high school biology lesson, we conducted a series of trials in  
143 different media to determine conditions that resulted in predictable, rapid adaptations.  
144 We found that growth in King's B medium (KB) generated multiple, heritable colony  
145 phenotypes within seven days. In the interest of accelerating the evolutionary dynamics,  
146 we repeated the experiment in KB medium with various glycerol concentrations. We  
147 found that an increase from 1.5% to 2.5% glycerol selected for novel colony  
148 morphologies at detectable frequencies in four days. We named this modified media  
149 recipe "Queen's B" (QB) and used this recipe thereafter. Media recipes are available in  
150 a supplemental file (Supplemental File 1).

151

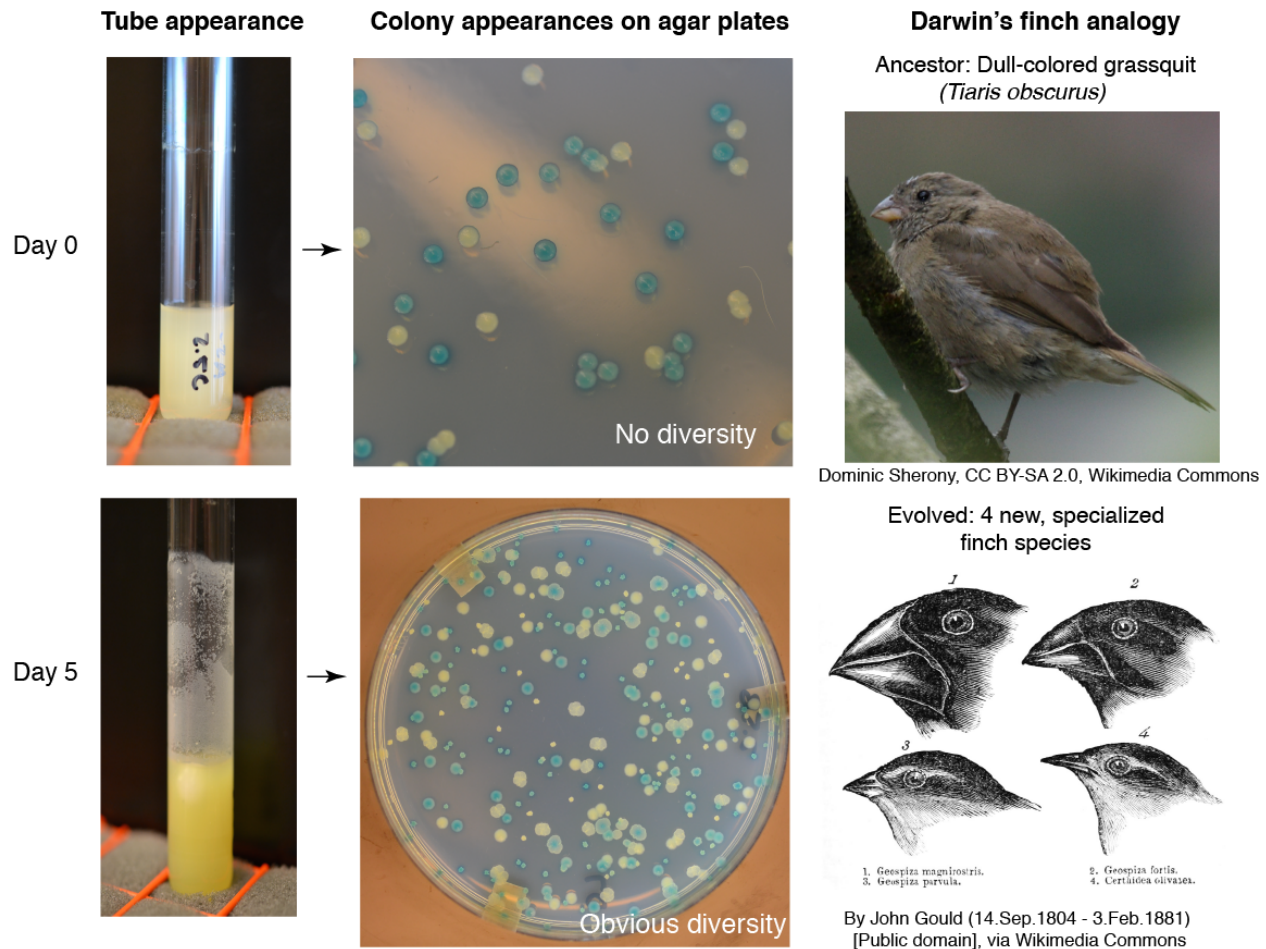

152

Fig. 2. Adaptation to biofilm selection can occur within days and produce conspicuous phenotypic differences. Populations were founded with equal ratios of Lac<sup>+</sup> (blue) and Lac<sup>-</sup> (white) ancestral genotypes that do not differ in morphology. After 5-7 days, new colony morphologies evolve and represent different biofilm-associated ecological strategies, as different beak shapes of Darwin's finches represent distinct feeding strategies (Rainey and Travisano 1998, Poltak and Cooper 2011).

153

154 Students can use our modified protocol to guide an inquiry-based experiment  
155 that allows them to visualize evolution in their bacterial populations in only six class  
156 periods (Fig 2). For example, on Monday, students inoculate glass test tubes containing  
157 QB media and a polystyrene bead with a clone of *P. fluorescens* SBW25, and then  
158 perform bead transfers for the following three days (Tuesday-Thursday). During the  
159 process of bead transfer, students can identify effects of natural selection by observing  
160 increased biofilm production on the walls of their test tubes. In addition, at the beginning  
161 and end of the week, students sample their populations by growing individual bacterial

162 colonies on agar plates. Students can make observations of mutant colonies on the  
163 Monday of the following week and compare these colonies to those of the ancestral  
164 population that were plated earlier in the week. Students can be given additional  
165 curriculum materials, such as homework and pretests, to prepare them for each step in  
166 the laboratory protocol and provide opportunities for them to link the heritable, adaptive  
167 evolutionary change they observe in their experiment to the evolutionary processes that  
168 produced this dynamic. Through EvolvingSTEM, students can acquire the knowledge to  
169 meet Next Generation Science Standards for Natural Selection and Evolution (Box 1;  
170 (NGSS Lead States 2013)). Curriculum materials are available as supplemental files  
171 (Supplemental Files 2-4).

172

### 173 ***Learning outcomes***

174 The exact outcome of any individual experiment is unknown because the biofilm  
175 selection acts on randomly occurring mutations in the bacterial populations that were  
176 founded from a single clone. In fact, this variability among these independent “replays”  
177 of evolution is realistic and demonstrates effects of chance and contingency on  
178 evolution (Blount et al. 2018). Nonetheless, student groups propagate multiple  
179 populations in different culture tubes under identical experimental conditions, and this  
180 replication means they are very likely to see mutants with novel morphologies in at least  
181 one experimental population. In addition, students compare their experimental  
182 populations to a control population that does not contain the bead and therefore is not  
183 under selection for increased biofilm production. Students can examine the phenotypes  
184 found in each population over time, compare their findings to those of other classmates,  
185 and develop their own explanations for their observations. This allows students to apply  
186 the comparative method of evolutionary biology and begin the process of scientific  
187 inquiry. Students are encouraged to consider why their replicate populations vary and  
188 propose reasons for that variation, ranging from experimental error, to peculiarities of  
189 the bead transfers, to genuine evolutionary randomness.

190



191 **Box 1. Next Generation Science Standards (NGSS) Targeted by EvolvingSTEM.**  
192 NGSS (2013) are based on *A Framework for K-12 Science Education: Practices,*  
193 *Crosscutting Concepts, and Core Ideas* (National Research Council 2012) and  
194 designed through a collaboration between 26 states, the National Research Council, the  
195 National Science Teachers Association, the American Association for the Advancement  
196 of Science, and Achieve, Inc.

197  
198 EvolvingSTEM provides students with the knowledge to meet the following NGSS HS-  
199 LS4 standards. These are performance expectations.

- 200 1. Communicate scientific information that common ancestry and biological evolution are supported by  
201 multiple lines of empirical evidence.
- 202 2. Construct an explanation based on evidence that the process of evolution primarily results from four  
203 factors: (1) the potential for a species to increase in number, (2) the heritable genetic variation of  
204 individuals in a species due to mutation and sexual reproduction, (3) competition for limited  
205 resources, and (4) the proliferation of those organisms that are better able to survive and reproduce  
206 in the environment.
- 207 3. Apply concepts of statistics and probability to support explanations that organisms with an  
208 advantageous heritable trait tend to increase in proportion to organisms lacking this trait.
- 209 4. Construct an explanation based on evidence for how natural selection leads to adaptation of  
210 populations.
- 211 5. Evaluate the evidence supporting claims that changes in environmental conditions may result in (1)  
212 increases in the number of individuals of some species, (2) the emergence of new species over time,  
213 and (3) the extinction of other species.

214  
215 In addition, for HS-LS4-2, students will learn:

- 216 • Random mutation results in genetic variation between members of a population.
- 217 • Genetic variation can result in trait variation that leads to performance differences among individuals.
- 218 • Competition for limited resources results in differential survival. Individuals with more favorable  
219 phenotypes are more likely to survive and reproduce, thus passing traits to subsequent generations.
- 220 • Evolutionary fitness is measured by reproductive success.
- 221 • An adaptation is a heritable genetic variant manifested as a trait that provides an advantage to an  
222 individual in a particular environment.
- 223 • In addition to natural selection, chance and random events can influence the evolutionary process,  
224 especially for small populations.

225  
226 In addition, students will be skilled at:

- 227 • Developing experimental investigations that can be used to test specific hypotheses.
- 228 • Evaluating evidence to qualitatively and quantitatively investigate the role of natural selection in  
229 evolution.
- 230 • Constructing evidence-based explanations that the process of evolution is a consequence of the  
231 interaction of four factors: (1) the potential for population size to increase, (2) genetic variation, (3)  
232 competition for resources, and (4) proliferation of individuals better able to survive and reproduce in a  
233 particular environment.
- 234 • Applying basic mathematics to calculate the fitness advantages of selected mutants and/or to  
235 compare differences in levels of biofilm production.
- 236 • Developing generalizations of the results obtained and/or the experimental design and applying them  
237 to new problems, including the design of new experiments and interpreting results in the context of  
238 natural and infectious bacterial biofilms.

239  
240 The speed of adaptation in biofilm models results from strong selection for more  
241 adherent mutants that bind not only the provided surface (e.g. polystyrene), but also

242 other attached bacteria or secreted substances. Consequently, selection often favors  
243 the evolution of diverse, conspicuous phenotypes within each tube and not just a single,  
244 more adherent type. This result not only simulates the process of adaptive radiation  
245 often illustrated using Darwin's finches in textbooks (Figure 2), but also reproduces the  
246 selection for traits associated with adherence that often occurs during biofilm-associated  
247 infections (Traverse et al. 2013; Cooper et al. 2014; O'Rourke et al. 2015; Gloag et al.  
248 2018). The "wrinkly" colony morphologies that evolve in our model are genetically and  
249 functionally identical to those commonly isolated from infections of the related species  
250 *Pseudomonas aeruginosa* in the airways of cystic fibrosis patients and in chronic skin  
251 wounds (Starkey et al. 2009; Gloag et al. 2018). Students can therefore connect their  
252 classroom experiments to recent findings at the interface of evolutionary biology and  
253 medicine to see how basic biological research impacts their everyday lives.  
254 Furthermore, making connections from classroom activities to real-world examples can  
255 increase students' understanding of evolution and their engagement with the material  
256 (Beardsley et al. 2011; Infanti and Wiles 2014).

257

### 258 ***Assessment of student learning***

259 We used a delayed intervention approach to assess learning in 4 classes of 9<sup>th</sup>  
260 grade biology honors students at Winnacunnet High School, a suburban public high  
261 school in New England. Group 1 included classroom A, taught by MH, and classroom B,  
262 taught by SS. This group used an earlier version of our EvolvingSTEM curriculum that  
263 did not use a control population alongside their standard curriculum materials, which  
264 included textbook readings, lectures, and an educational video. Group 2 included  
265 classrooms C and D, both taught by SS. This group first received the standard  
266 curriculum with additional lecture materials, followed by EvolvingSTEM (Table 1).  
267 Students conducted the experiments and analyses for our curriculum in groups of three  
268 or four individuals, requiring collaborative teamwork.

269

270 A summative assessment was used to determine whether students achieved an  
271 increased understanding of evolutionary concepts. The test consisted of multiple choice  
272 and free response questions to address student learning of higher-order critical thinking

273 aligned to NGSS. Specifically, test questions were devised to assess whether students  
274 met NGSS (2013) performance expectations HS-LS4-1,2,3, and 5. We developed a  
275 grading rubric for the free response questions based on templates suggested by  
276 Wiggins and McTighe (2005) that required answers with accurate information, specific  
277 vocabulary, and a well-structured defense that incorporated outside examples (Wiggins  
278 and McTighe 2005). Our assessment and grading rubric are available as supplemental  
279 files (Supplemental File 5). All assessments were conducted by one of us (TW) on  
280 anonymized tests as proscribed by our IRB.  
281

| Group | Class – Teacher | Number of Students per Class | Total Number of Students per Group |
|-------|-----------------|------------------------------|------------------------------------|
| 1     | A – Teacher MH  | 19                           | 41                                 |
|       | B – Teacher SS  | 22                           |                                    |
| 2     | C – Teacher SS  | 18                           | 37                                 |
|       | D – Teacher SS  | 19                           |                                    |

282  
283  
284

**Table 1: Composition of Study Groups.**

285           Pretests were given to both groups prior to the start of classroom evolution  
286 activities. Group 1 students were given a posttest after completing the EvolvingSTEM  
287 curriculum. Group 2 students were given a midtest after completing the standard  
288 curriculum, and then a posttest after completing EvolvingSTEM. We found no significant  
289 difference between the average pretest score of Group 1 and Group 2 students (13.17  
290 (26%) vs. 12.5 (25%) out of 50 points total;  $t=0.60$ ,  $p=n.s.$ ), indicating that all students  
291 began with a similar knowledge base (Fig. 3). Quantitative analyses of student  
292 knowledge gains revealed that students who completed EvolvingSTEM (Group 1)  
293 showed significant improvement on their average posttest scores, with an average gain  
294 of 19.16 points, thereby increasing their overall score by 38% between the pre- and  
295 posttest ( $t=16.61$ ,  $p<0.0001$ ). Students provided the standard curriculum (Group 2) also  
296 showed significant improvement on their average midtest score, which increased by  
297 10.14 points ( $t= 9.72$ ,  $p<0.0001$ ), resulting in an overall increase of 21% between pre-  
298 and midtest. Although both student groups showed improvement, Group 1 achieved  
299 significantly higher average test scores after completing EvolvingSTEM than Group 2

300 did after completing the standard curriculum ( $t=5.87$ ,  $p<0.0001$ ). Students who learned  
301 evolution with EvolvingSTEM therefore achieved significantly greater gains in  
302 comprehension of evolution than students who learned it from the standard curriculum.

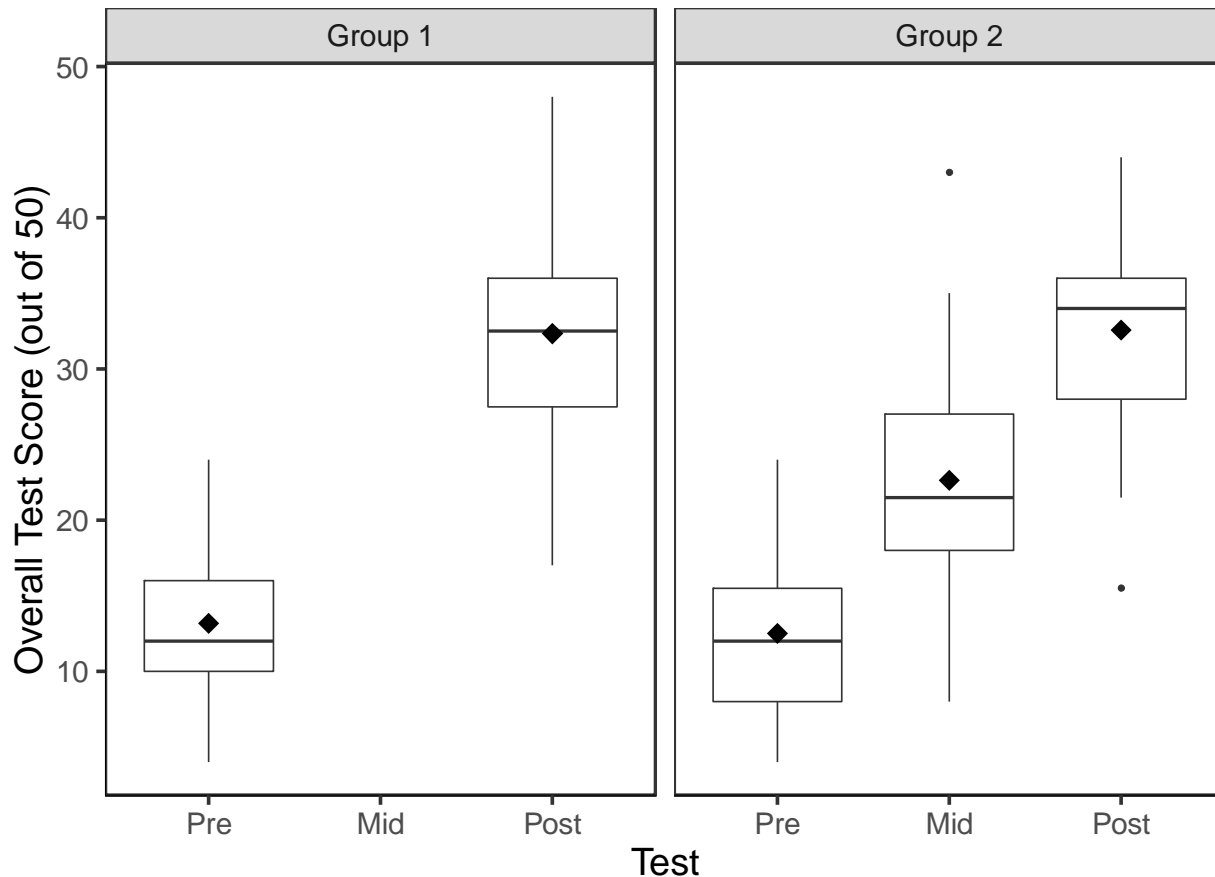

303

Fig. 3. Boxplot of student assessment scores. The EvolvingSTEM curriculum produces significantly greater gains in comprehension of NGSS topic HS-LS-4 than the standard curriculum (Group 1 Post vs Group 2 Mid,  $t=5.87$ ,  $p<0.0001$ ). After experiencing our curriculum, Group 2 students subsequently achieved equivalent scores to Group 1 students (Group 1 Post vs Group 2 Post,  $t=0.14$ , ns). Mean values are indicated with diamonds.

304

305 Once students in Group 2 were exposed to EvolvingSTEM, their average  
306 posttest scores had an overall increase of 20% in comparison to their midtest scores,  
307 reaching knowledge gains made by Group 1 students (Fig. 3). Knowledge gains by both  
308 Groups were overwhelmingly attributable to increased scores on the free-response  
309 section of the assessment. Average free-response scores from pretests to posttests  
310 increased by 18.09 points (48%) for Group 1 students and 20.59 points (54%) for Group

311 2 students. In comparison, average multiple-choice scores increased by 1.07 points for  
312 Group 1 students and decreased by 0.54 points for Group 2 students. These results  
313 may indicate that EvolvingSTEM has a greater impact on improving students' higher-  
314 order cognitive skills, such as applying knowledge to an unknown problem and  
315 performing data analysis. There was no significant difference between Group 1 and 2  
316 posttest scores ( $t=0.14$ ,  $p=n.s.$ ), even though Group 2 students were provided more  
317 detailed verbal instruction and took one additional assessment. This result speaks to the  
318 power of EvolvingSTEM to increase student knowledge and suggests that our  
319 curriculum can serve to replace, rather than supplement, the standard evolution  
320 curriculum.

321

## 322 **Discussion**

323 We developed an inquiry-based microbiology curriculum to improve the  
324 engagement of high school biology students with topics central to evolutionary biology  
325 and their subsequent understanding of related NGSS concepts. We observed high  
326 levels of engagement when students participated in our curriculum. Students were  
327 assigned concept and readiness tests each night to ensure that they arrived prepared  
328 for the next day's microbiology experiments and evolution curriculum. Their high rates of  
329 completion indicated increased enthusiasm. While we acknowledge this is a simple  
330 observation, teachers and coauthors (MH and SS) also indicated that students who  
331 rarely participated in class-based discussions emerged as enthusiastic group leaders  
332 while performing the EvolvingSTEM experiment. Informal post-surveys of student  
333 attitudes towards the curriculum were overwhelmingly positive. Students indicated that  
334 they were enthusiastic about the bacterial model, enjoyed coming to class to work on  
335 the experiment, and felt that our curriculum was better at teaching them than the  
336 standard lecture-style class. The group format for the experiments and analyses  
337 encouraged the students to collaborate and support one another throughout the  
338 program. Students tended to hold one another accountable, but also demonstrated  
339 cohesion when groups compared their replicate populations, demonstrating both  
340 friendly competition and pride and ownership in their results. Further, many students  
341 expressed that they felt like "real scientists" using equipment like pipettes, vortexes, and

342 the incubator. They shared a greater sense of what science was actually like and asked  
343 more questions about microbiology and evolution research and other scientific careers.

344

345 Crucially, teachers found EvolvingSTEM to be effective at demonstrating  
346 evolution in action, thereby increasing student understanding of natural selection,  
347 mutation, and the effects of chance, and increasing student interest and engagement  
348 with biology. Student assessments also demonstrated the substantial benefit of our  
349 curriculum to student learning, and consequently, our curriculum replaced the standard,  
350 honors biology WHS evolution curriculum in subsequent years. The sustainability of the  
351 EvolvingSTEM curriculum has been greatly facilitated by the involvement of returning  
352 students who demonstrated particular interest in the program and who served as *de*  
353 *facto* teaching assistants through an Extended Learning Opportunity program. (More  
354 information about this program will be the subject of a future report.) This teaching  
355 experience was made possible by engaging first-year students in laboratory research,  
356 which allowed them to help teach new students for up to three subsequent years prior to  
357 graduating.

358

359 We found that EvolvingSTEM provided students with significant learning benefits  
360 in comparison to standard curricula. After completing our curriculum, students achieved  
361 significantly higher scores on a knowledge assessment of evolution than students who  
362 had followed the standard curriculum. After completing our curriculum, students who  
363 were originally provided only the standard curriculum were able to further increase their  
364 assessment scores to meet the gains made by students who were taught evolution only  
365 with EvolvingSTEM. Our results demonstrate the power of microbial evolution  
366 experiments to effectively teach concepts in population genetics and evolution while  
367 also providing valuable experience in microbiology. Furthermore, EvolvingSTEM can  
368 serve as an instructional foundation of other life science topics. For example, further  
369 investigations by students could identify the genetic mutations (using inexpensive  
370 whole-genome sequencing, i.e. (Cooper 2018)) that underlie the adaptive mutant  
371 phenotypes, supporting a greater understanding of inheritance and trait variation (NGSS  
372 HS-LS3). Previous research in our lab indicates that many commonly identified

373 mutations are found in the *wsp* (wrinkly spreader phenotype) gene cluster (Cooper et al.  
374 2014; Gloag et al. 2018), which coordinates bacterial surface recognition with increased  
375 biofilm production (Hickman et al. 2005). Students are likely to identify *wsp* mutants in  
376 their classroom experiments and can therefore connect how changes in DNA can result  
377 in changes in protein structure and intracellular signaling that lead to increased biofilm  
378 production and changes to colony morphology, supporting a greater understanding of  
379 DNA, protein structure, and cellular function (NGSS HS-LS1). Furthermore, the bacterial  
380 adaptations are in response to environmental changes that provide new niches,  
381 supporting a greater understanding of interdependent relationships in ecosystems  
382 (NGSS HS-LS2). Classroom experiments that build upon the core evolution study can  
383 therefore span much of the NGSS-recommended introductory biology curriculum and  
384 have been adapted to cover more advanced topics for Advanced Placement (AP)  
385 Biology as well as to early biology courses in community colleges or four-year colleges.

386 This study was limited to one school and two teachers from a suburban public  
387 school in New Hampshire, which naturally raises the question of its efficacy in other  
388 settings. However, since the program launch and assessments reported here,  
389 EvolvingSTEM has expanded to be offered in 13 high schools in four different US states  
390 with continued growth. These schools range from independent private schools, to  
391 suburban public schools, to urban public and magnet high schools, and the classes  
392 include introductory “academic” and honors biology, upper-level biotechnology, and AP  
393 biology. The core experimental protocol described here has been shown to be robust to  
394 different class schedules and student populations, provided that the classroom has the  
395 laboratory resources detailed in Supplemental File 1, including the capacity to prepare  
396 sterile growth media either onsite or through a partner laboratory. Additional  
397 assessments of learning and motivation towards STEM subjects are ongoing in these  
398 schools, but informal teacher and student feedback has been overwhelmingly positive.

399

## 400 **Summary**

401 EvolvingSTEM is an engaging, inquiry-based curriculum that provides students  
402 with a hands-on approach to visualize evolutionary change occurring in real time. It also  
403 can be delivered at a low cost per student (<\$5 in consumables) and is therefore

404 potentially suitable for broad distribution. Our curriculum provides students with the tools  
405 to understand evolutionary concepts and to apply their knowledge to other areas of life  
406 science and medicine. For example, students can make a direct link between the  
407 adaptive phenotypes they see in the classroom for increased biofilm production and the  
408 nearly identical phenotypes seen in clinically relevant biofilm-associated bacterial  
409 infections. In addition, students are provided an introduction to microbiological  
410 techniques that have important applications for biotechnology. A particularly powerful  
411 aspect of our curriculum is its positive effect on teacher and student engagement.  
412 Teachers and students embark on the research experiment together, which provides a  
413 collaborative classroom environment where both have the opportunity for greater  
414 understanding and discovery. EvolvingSTEM has exceptional ability to improve  
415 scientific literacy and the promise of promoting broad acceptance of evolution as a  
416 central, unifying theory for life science.

417

418

#### 419 **Acknowledgements**

420 We thank Stephen Hale from the University of New Hampshire for assistance in  
421 designing the assessment and Caroline Turner for critical feedback. This research was  
422 conducted according to IRB protocol #5937 from the University of New Hampshire  
423 supported by NSF CAREER DEB-0845851, NASA CAN-7NNA15BB04A, and  
424 discretionary funds from the University of Pittsburgh, School of Medicine to VSC.

425



## 426 **References**

- 427 Alizon S, Méthot P-O. Reconciling Pasteur and Darwin to control infectious diseases.  
428 Read A, editor. *Plos Biol.* 2018 Jan 18;16(1):e2003815–12.
- 429 Ashish A, Paterson S, Mowat E, Fothergill JL, Walshaw MJ, Winstanley C. Extensive  
430 diversification is a common feature of *Pseudomonas aeruginosa* populations during  
431 respiratory infections in cystic fibrosis. *Journal of Cystic Fibrosis.* European Cystic  
432 Fibrosis Society; 2013 Dec 1;12(6):790–3.
- 433 Beardsley PM, Stuhsatz MAM, Kruse RA, Eckstrand IA, Gordon SD, Odenwald WF.  
434 Evolution and Medicine: An Inquiry-Based High School Curriculum Supplement.  
435 Evolution: Education and Outreach. 2nd ed. Springer; 2011 Oct 8;4(4):603–12.
- 436 Berendonk TU, Manaia CM, Merlin C, Fatta-Kassinos D, Cytryn E, Walsh F, et al.  
437 Tackling antibiotic resistance: the environmental framework. Nature Publishing  
438 Group. Nature Publishing Group; 2015 Mar 30;13(5):310–7.
- 439 Blount ZD, Lenski RE, Losos JB. Contingency and determinism in evolution: Replaying  
440 life's tape. *Science.* 2018 Nov 8;362(6415):eaam5979–12.
- 441 Broder ED, Angeloni LM, Simmons S, Warren S, Knudson KD, Ghalambor CK.  
442 Authentic Science with Live Organisms Can Improve Evolution Education. *The*  
443 *American Biology Teacher.* 2018 Jan 29;80(2):116–23.
- 444 Cooper VS. Experimental Evolution as a High-Throughput Screen for Genetic  
445 Adaptations. Gales AC, editor. *mSphere.* 2018 Jun 27;3(3):45–7.
- 446 Cooper VS, Staples RK, Traverse CC, Ellis CN. Parallel evolution of small colony  
447 variants in *Burkholderia cenocepacia* biofilms. *Genomics.* The Authors; 2014 Dec  
448 1;104(Part A):447–52.
- 449 Costerton JW, Cheng KJ, Geesey GG, Ladd TI, Nickel JC, Dasgupta M, et al. Bacterial  
450 biofilms in nature and disease. *Annual Review of Microbiology,* Vol 64, 2010.  
451 1987;41:435–64.
- 452 Cunningham DL, Wescott DJ. Still More “Fancy” and “Myth” than “Fact” in Students’  
453 Conceptions of Evolution. *Evolution: Education and Outreach.* Springer; 2009 Sep  
454 1;2(3):505–17.
- 455 Flynn KM, Dowell G, Johnson TM, Koestler BJ, Waters CM, Cooper VS. Evolution of  
456 Ecological Diversity in Biofilms of *Pseudomonas aeruginosa* by Altered Cyclic  
457 Diguanylate Signaling. O’Toole GA, editor. *J Bacteriol.* 2016 Sep 9;198(19):2608–  
458 18.
- 459 Freeman S, Eddy SL, McDonough M, Smith MK, Okoroafor N, Jordt H, et al. Active  
460 learning increases student performance in science, engineering, and mathematics.  
461 *Proc Natl Acad Sci USA.* 2014 Jun 10;111(23):8410–5.

- 462 Glaze AL, Goldston MJ. US science teaching and learning of evolution: A critical review  
463 of the literature 2000–2014. *Sci Ed*. 2015;99(3):500–18.
- 464 Gloag ES, Marshall C, Snyder D, Lewin GR, Harris JS, Chaney SB, et al. The  
465 *Pseudomonas aeruginosa* Wsp pathway undergoes positive evolutionary selection  
466 during chronic infection. *bioRxiv*. 2018.
- 467 Greaves M, Maley CC. Clonal evolution in cancer. *Nature*. 2012 Jan 19;481(7381):306–  
468 13.
- 469 Green JH, Koza A, Moshynets O, Pajor R, Ritchie MR, Spiers AJ. Evolution in a test  
470 tube: rise of the Wrinkly Spreaders. *Journal of Biological Education*. 2011 Jan  
471 20;45(1):54–9.
- 472 Gregory TR. Understanding Natural Selection: Essential Concepts and Common  
473 Misconceptions. *Evolution: Education and Outreach*. 2nd ed. 2009 Apr 9;2(2):156–  
474 75.
- 475 Harrison JJ, Turner RJ, Ceri H. Persister cells, the biofilm matrix and tolerance to metal  
476 cations in biofilm and planktonic *Pseudomonas aeruginosa*. *Environ Microbiol*. 2005  
477 Jul;7(7):981–94.
- 478 Hickman JW, Tifrea, Harwood. A chemosensory system that regulates biofilm formation  
479 through modulation of cyclic diguanylate levels. *PNAS*. 2005.
- 480 Infanti LM, Wiles JR. “Evo in the News:” Understanding Evolution and Students’  
481 Attitudes toward the Relevance of Evolutionary Biology. *Bioscene*. 2014.
- 482 Jordan TC, Burnett SH, Carson S, Caruso SM, Clase K, DeJong RJ, et al. A Broadly  
483 Implementable Research Course in Phage Discovery and Genomics for First-Year  
484 Undergraduate Students. *MBio*. 2014;5(1):493–8.
- 485 Karatan E, Watnick P. Signals, Regulatory Networks, and Materials That Build and  
486 Break Bacterial Biofilms. *Microbiol Mol Biol Rev*. 2009 Jun 1;73(2):310–47.
- 487 Knott GJ, Doudna JA. CRISPR-Cas guides the future of genetic engineering. *Science*.  
488 2018.
- 489 Makarova KS, Wolf YI, Alkhnbashi OS, Costa F, Shah SA, Saunders SJ, et al. An  
490 updated evolutionary classification of CRISPR–Cas systems. *Nature Publishing*  
491 *Group*. *Nature Publishing Group*; 2015 Sep 28;13(11):722–36.
- 492 Makohon-Moore A, Iacobuzio-Donahue CA. Pancreatic cancer biology and genetics  
493 from an evolutionary perspective. *Nature Publishing Group*. *Nature Publishing*  
494 *Group*; 2016 Jul 22;16(9):553–65.
- 495 Martin M, Hölscher T, Dragoš A, Cooper VS, Kovács ÁT. Laboratory Evolution of  
496 Microbial Interactions in Bacterial Biofilms. O’Toole GA, editor. *J Bacteriol*. 2016 Sep

- 497 9;198(19):2564–71.
- 498 National Research Council. A framework for K-12 science education: Practices,  
499 crosscutting concepts, and core ideas. Washington, DC: The National Academies  
500 Press; 2012.
- 501 Nehm RH, Reilly L. Biology Majors' Knowledge and Misconceptions of Natural  
502 Selection. *BioScience*. Oxford University Press; 2007 Mar 1;57(3):263–72.
- 503 Nelson CE. Teaching evolution (and all of biology) more effectively: Strategies for  
504 engagement, critical reasoning, and confronting misconceptions. *Integrative and*  
505 *Comparative Biology*. 2008 Jun 21;48(2):213–25.
- 506 NGSS Lead States. Next generation science standards: For states, by states.  
507 Washington, DC: The National Academies Press; 2013.
- 508 NSTA. NSTA Position Statement: The Teaching of Evolution. 2013 Jul 30;;1–7.
- 509 O'Rourke D, FitzGerald CE, Traverse CC, Cooper VS. There and back again:  
510 consequences of biofilm specialization under selection for dispersal. *Front Genet.*  
511 *Frontiers*; 2015;6(e225).
- 512 Pobiner B. Accepting, understanding, teaching, and learning (human) evolution:  
513 Obstacles and opportunities. *Am J Phys Anthropol*. 3rd ed. 2016 Jan  
514 25;159(3):232–74.
- 515 Poltak SR, Cooper VS. Ecological succession in long-term experimentally evolved  
516 biofilms produces synergistic communities. *The ISME Journal*. Nature Publishing  
517 Group; 2011;5(3):369–78.
- 518 Rainey P, Buckling A, Kassen R, TRAVISANO M. The emergence and maintenance of  
519 diversity: insights from experimental bacterial populations. *Trends in Ecology &*  
520 *Evolution*. 2000 Jun;15(6):243–7.
- 521 Rainey PB, Travisano M. Adaptive radiation in a heterogeneous environment. *Nature*.  
522 1998.
- 523 Ratcliff WC, Raney A, Westreich S, Cotner S. A novel laboratory activity for teaching  
524 about the evolution of multicellularity. *The American Biology Teacher*.  
525 2014;76(2):81–7.
- 526 Romine WL, Walter EM, Bosse E, Todd AN. Understanding patterns of evolution  
527 acceptance-A new implementation of the Measure of Acceptance of the Theory of  
528 Evolution (MATE) with Midwestern university students. *J Res Sci Teach*. 2nd ed.  
529 2017 Jan 12;54(5):642–71.
- 530 Sickel AJ, Friedrichsen P. Examining the evolution education literature with a focus on  
531 teachers: major findings, goals for teacher preparation, and directions for future

- 532 research. *Evolution: Education and Outreach*. 2nd ed. 2013 Jul 5;6(1):1105–15.
- 533 Smith MU. Current Status of Research in Teaching and Learning Evolution: I.  
534 Philosophical/Epistemological Issues. *Sci & Educ*. Springer Netherlands;  
535 2010a;19(6-8):523–38.
- 536 Smith MU. Current Status of Research in Teaching and Learning Evolution: II.  
537 Pedagogical Issues. *Sci & Educ*. 2nd ed. 2010b;19(6-8):539–71.
- 538 Spiers AJ. The *Pseudomonas fluorescens* SBW25 wrinkly spreader biofilm requires  
539 attachment factor, cellulose fibre and LPS interactions to maintain strength and  
540 integrity. *Microbiology*. 2005 Sep 1;151(9):2829–39.
- 541 Spiers AJ. Getting Wrinkly Spreaders to demonstrate evolution in schools. *Trends in*  
542 *Microbiology*. Elsevier Ltd; 2014 Jun 1;22(6):301–3.
- 543 Starkey M, Hickman JH, Ma L, Zhang N, De Long S, Hinz A, et al. *Pseudomonas*  
544 *aeruginosa* rugose small-colony variants have adaptations that likely promote  
545 persistence in the cystic fibrosis lung. *J Bacteriol. American Society for Microbiology*  
546 *Journals*; 2009 Jun;191(11):3492–503.
- 547 Traverse CC, Mayo-Smith LM, Poltak SR, Cooper VS. Tangled bank of experimentally  
548 evolved *Burkholderia* biofilms reflects selection during chronic infections. *Proc Natl*  
549 *Acad Sci USA*. 2013;110(3):E250–9.
- 550 Turner, Marshall CW, Cooper VS. Parallel genetic adaptation across environments  
551 differing in mode of growth or resource availability. *Evolution Letters*. Wiley-  
552 Blackwell; 2018 Aug 4;2(4):355–67.
- 553 Wells J, Nesse RM, Sear R, Johnstone RA, Stearns SC. Evolutionary public health:  
554 introducing the concept. *The Lancet*. 2017.
- 555 Wiggins G, McTighe. *Understanding by Design (Expanded 2nd Ed.)* Alexandria: VA:  
556 ASCD. 2005.
- 557 Yates TB, Marek EA. Teachers teaching misconceptions: a study of factors contributing  
558 to high school biology students' acquisition of biological evolution-related  
559 misconceptions. *Evolution: Education and Outreach*. 2nd ed. 2014 Mar 15;7(1):1–  
560 18.

561 **Supplemental Files**

562 **Sup. 1: Materials Needed and Media Recipes**

563 **Sup. 2: EvolvingSTEM Experimental Protocol**

564 **Sup. 3: Curriculum Overview**

565 **Sup. 4: Pre and Post Lab Questions**

566 **Sup. 5: Student Test and Grading Rubric**

567

568 **Materials Needed per Classroom**

569

570 **Materials for entire classroom**

- 571 ○ Gloves (will need at least 6 pairs per student)
- 572 ○ Spray bottle of 70% Ethanol (to clean benchtop)
- 573 ○ Spray bottle of 10% Bleach (to decontaminate bacterial cultures and plates)
- 574 ○ Orbital shaker
- 575 ○ Incubator
- 576 ○ Serological pipettes and Pipette aid (to prefill tubes with media and PBS)
- 577 ○ *Pseudomonas fluorescens* SBW25 colonies streaked on ½ Tsoy-Agar plates (need
- 578 to have 4 distinct colonies for each student group)
- 579 ○ Autoclave (to sterilize reusable materials and media)
- 580 ○ Dissecting microscope (not required, but helpful to visualize colonies)

581

582 **Materials for each student group**

- 583 ○ Bunsen burner
- 584 ○ Vortex
- 585 ○ Micropipettes and tips: p200 and p1000
- 586 ○ Forceps: 1 pair
- 587 ○ Metal inoculation loop: 1
- 588 ○ Glass spreader beads
- 589 ○ Glass culture tubes (15mL): 36
- 590 ○ Small glass tubes (5mL): 8
- 591 ○ 5 and 15 mL tube racks
- 592 ○ White beads: 9
- 593 ○ Black beads: 3
- 594 ○ Queen's B Media: 82mL
- 595 ○ PBS: 102mL
- 596 ○ Tsoy-agar plates: 12

597

598 **Media Recipes**

599

600 **1L Queen's B Media**

- 601 • 20g Proteose Peptone No. 3  
602 • 1.5g K<sub>2</sub>HPO<sub>4</sub> (Potassium Phosphate Dibasic)  
603 • 25mL Glycerol  
604 • 970mL Water  
605  
606 1. Autoclave for 45 minutes  
607 2. Allow to cool to room temperature  
608 3. Add 6mL of 1M MgSO<sub>4</sub> (Magnesium Sulfate) stock  
609

609

610 **250mL 1M MgSO<sub>4</sub> Stock**

- 611 • 30g MgSO<sub>4</sub> (anhydrous)  
612 *or*  
613 • 61.6g MgSO<sub>4</sub> (heptahydrate)  
614 • 250mL Water  
615  
616 1. Combine salts and water  
617 2. Autoclave for 30-45 minutes  
618

618

619

620 **1L PBS**

- 621 • 7.65g NaCl  
622 • 0.72g Na<sub>2</sub>HPO<sub>4</sub> (Sodium Phosphate Dibasic, anhydrous)  
623 • 0.21g KH<sub>2</sub>PO<sub>4</sub> (Potassium Phosphate Monobasic)  
624 • 1L Water  
625  
626 1. Combine salts and water  
627 2. Autoclave for 45 minutes  
628

628

629

630 **1L ½ Strength Tsoy-Agar (makes approximately 50 Plates)**

- 631 • 15g Tsoy  
632 • 15g Agar  
633 • 1L Water  
634  
635 1. Autoclave for 45 minutes  
636 2. Pour plates while still hot (so agar does not harden)  
637 3. Allow to solidify overnight before using  
638

638

639

640  
641  
642  
643  
644  
645  
646  
647  
648

# EvolvingSTEM

## *Pseudomonas fluorescens* Experimental Evolution Protocol

You are about to embark on a journey through a world that you might be unfamiliar with; one filled with odd instruments that you will use to study oddly shaped slimy bacterial colonies and neon yellow biofilm-coated test tubes. Over the course of the next few weeks you will be taking care of bacterial cultures, and your ordinary looking colonies will evolve to produce distinct mutants that have adapted to inhabit different parts of a test tube.

### ALWAYS REMEMBER

Proper **aseptic technique** is a very important part of microbiology! All tubes, beads, and media have been sterilized in an **autoclave** prior to use in these experiments. When tubes were prepared, media was always distributed using sterile pipettes, and sterile beads were added using forceps that have been heated over a flame until “red-hot” to prevent contamination.

### USEFUL TERMS

**Aseptic Technique** – a sterile set of practices and procedures performed to minimize contamination by other bacteria.

**Autoclave** – a strong, heated container that reaches high temperature and pressure to sterilize equipment and media.

### SAFETY FIRST!

**You will be working with an open flame during this experiment.** Always be aware of your surroundings to ensure that you do not burn yourself or start a fire. Be sure to know the location of the closest emergency shower and fire extinguisher in case an accident does occur.

**Always treat the bacteria you will be working with as potential pathogens** (even though *P. fluorescens* is harmless to humans!). Be sure to disinfect your work stations and waste materials with 10% bleach and always follow general safe lab procedures, including tying back long hair, washing your hands at the end of the lab activity, and wearing gloves and lab coats.

The following links provide excellent information on:  
General Lab Safety: <https://www.youtube.com/watch?v=MEIXRLcC6RA&vl=en>  
Safely Working with Microorganisms: <https://www.sciencebuddies.org/science-fair-projects/references/microorganisms-safety>

649



650 DAY 1 (MONDAY): PRECONDITIONING YOUR BACTERIAL CULTURE

651  
652 *Before the bacteria got to your classroom, they had been stored in a freezer for a long*  
653 *period of time at -80° Celsius (-112° Fahrenheit). Before we can continue with our*  
654 *experiment, we want to ensure that the bacteria are used to being out of the freezer so*  
655 *they are performing at their prime. In order to do so, we give them time to get*  
656 *acclimated to their new environmental conditions – this day is known as our*  
657 *“Preconditioning Day”.*  
658

659 **NECESSARY MATERIALS**

- 660
- 661 • Inoculation loops
  - 662 • *Pseudomonas fluorescens* SBW25 colonies (on agar plate)
  - 663 • 3 Large glass culture tubes containing:  
664     5 mL Queen’s B Medium (QB)  
665     1 white polystyrene bead
  - 666 • 1 Large glass culture tube containing:  
667     5 mL Queen’s B Medium (QB)
  - 668
  - 669

670 **PROCEDURE:**

- 671
- 672 1. Use an inoculation loop to transfer a **single**
  - 673 **isolated** *P. fluorescens* colony to a **single**
  - 674 **culture tube.**
  - 675
  - 676 2. Repeat until you have inoculated all four
  - 677 tubes: “1”, “2”, “3”, “C”.
  - 678 **BE SURE TO USE A NEW COLONY TO**
  - 679 **INOCULATE EACH TUBE!**
  - 680

- 681 3. Incubate the culture tubes on a rotating shaker at 28°C until your next class.
- 682

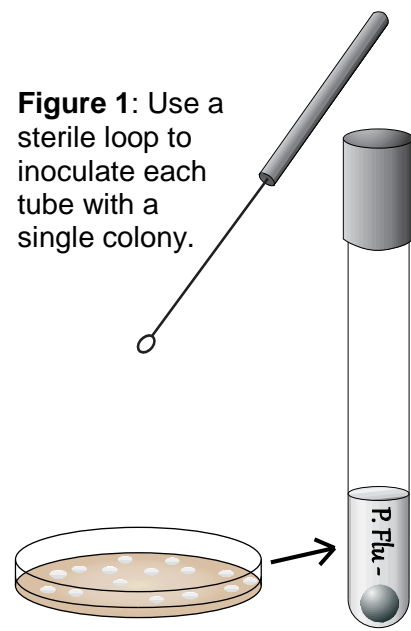

683  
684  
685  
686  
687  
688  
689  
690  
691  
692  
693  
694  
695  
696  
697  
698  
699  
700  
701  
702  
703  
704  
705  
706  
707  
708  
709  
710  
711  
712  
713  
714

## DAY 2 (TUESDAY): BEAD TRANSFER AND PLATING

### NECESSARY MATERIALS:

- Metal forceps
- 4 Small glass tubes containing 1 mL QB
- Vortex
- A p200 and p1000 pipette
- 3 Large glass evolution tubes containing:
  - 4.5 mL QB
  - 1 **white** polystyrene bead
- 1 Large glass control tube containing:
  - 4.5 mL QB
- 8 Large glass culture tubes containing 5 mL Phosphate Buffered Saline (PBS)
- 4 ½ Strength Tsoy-Agar plates with small glass beads

### PROCEDURE:

1. Label the large glass culture tubes and agar plates in an identifiable manner.
2. Flame sterilize the forceps and allow them cool for 30 seconds.

*After flaming the forceps they must not touch anything else, or they are no longer considered to be sterile!*

3. **For each evolution culture:** Pour the contents of the culture tube into its metal cap, and then use sterile forceps to transfer **ONLY** the bead to the corresponding small QB tube.

*It is possible that you may hear a sizzle; this is normal and just means that the forceps are still hot from sterilization. Allow them to cool until you no longer hear a sizzle before you touch the polystyrene bead.*

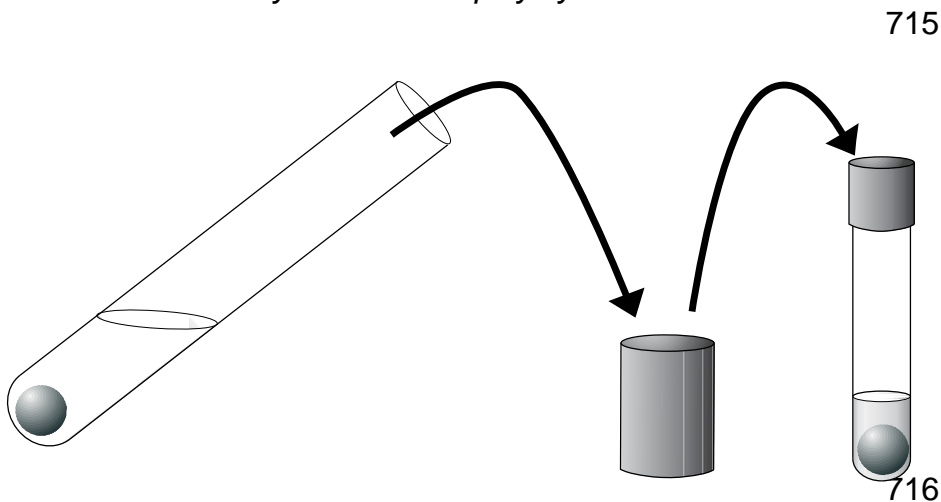

**Figure 2:** The preconditioning culture (left) is poured into its cap, and then sterile forceps are used to move only the bead to the small QB tube (right).

Vortex the

717 small QB tube for at least 45 seconds to remove biofilm from the bead.

718

719 **For the control tube:** Briefly swirl the control culture tube, and then use a **p200**

720 pipette to transfer 50  $\mu$ l of the culture to the small QB tube. Briefly vortex the

721 small QB tube.

722

723 **Perform the following steps for all evolution and control cultures:**

724

725 4. Use a **p1000** pipette to transfer 500  $\mu$ l from the small QB tube to the large QB

726 tube. Briefly vortex to mix.

727

728 5. Use a **p200** pipette to transfer 50  $\mu$ l from the large QB tube to a PBS tube ( $10^{-2}$

729 dilution). Briefly vortex to mix.

730

731 6. Use a **p200** pipette to transfer 50  $\mu$ l from the  $10^{-2}$  tube to a new PBS tube ( $10^{-4}$

732 dilution). Briefly vortex to mix.

733

734 7. Use a **p200** pipette to transfer 100  $\mu$ l of the  $10^{-4}$  dilution to an agar plate.

735

736 8. Shake the plate with the lid on top using the glass beads to spread the liquid

737 culture. Remove the glass beads by turning the plate upside down and dumping

738 the beads from the lid into the container provided.

739

740 9. Incubate the culture tubes on a rotating shaker at 28°C until your next class.

741 Incubate the plates, **upside down**, at 28°C until your next class.

742

743

744

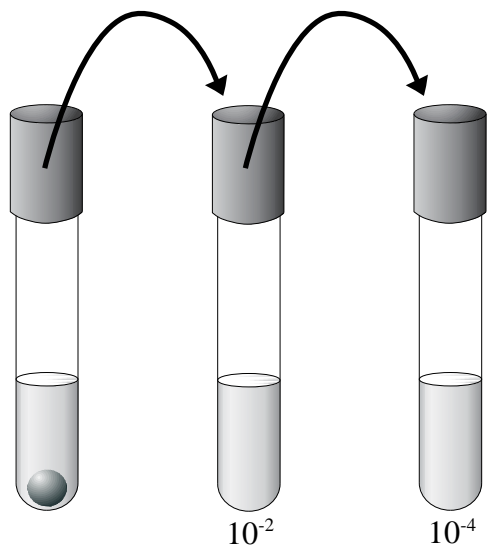

**Figure 3:** Serial dilution from the evolution tube (left) into PBS.

745  
746  
747  
748  
749  
750  
751  
752  
753  
754  
755  
756  
757  
758  
759  
760  
761  
762  
763  
764  
765  
766  
767  
768  
769  
770  
771  
772  
773  
774  
775  
776

### DAY 3 (WEDNESDAY): BEAD TRANSFER

*The millions of cells that you added to your tube will quickly grow to become billions. It doesn't take long before the bacteria consume the food and nutrients provided by the media inside of the test tube. In order to make sure that the bacteria continue to survive, we have to transfer a small number into a new tube. In the case of our experimental cultures, we transfer only the bacteria that are good at forming biofilm and have thus successfully stuck to the bead.*

#### NECESSARY MATERIALS:

- Metal forceps
- Vortex
- p200 pipette
- 3 Large glass evolution tubes containing:
  - 5ml QB
  - 1 **black** polystyrene bead
- 1 Large glass control tube containing:
  - 5ml QB

#### PROCEDURE:

1. Flame sterilize and cool the forceps.
2. **For each evolution culture:** Pour the contents of the culture tube into its metal cap, and then use sterile forceps to transfer the **white bead** to a new evolution tube with fresh media and a **black bead**.

**For the control culture:** Briefly swirl the control culture tube, and then use the **p200** pipette to transfer 50  $\mu$ l of the culture to the new control tube.

3. Incubate the culture tubes on a rotating shaker at 28°C until your next class.

777  
778  
779  
780  
781  
782  
783  
784  
785  
786  
787  
788  
789  
790  
791  
792  
793  
794  
795  
796  
797  
798  
799  
800  
801  
802  
803  
804  
805  
806  
807

## DAY 4 (THURSDAY): BEAD TRANSFER

*You may have noticed that your incubated test tubes now contain both a white and a black bead. Today, you are transferring your black bead to a new tube containing fresh media and a white bead. Over time, some of the bacteria from the black bead will detach and re-adhere to the surface of the white bead.*

### NECESSARY MATERIALS:

- Metal forceps
- Vortex
- p200 pipette
- 3 Large glass evolution tubes containing:
  - 5ml QB
  - 1 **white** polystyrene bead
- 1 Large glass control tube containing:
  - 5ml QB

### PROCEDURE:

1. Flame sterilize and cool the forceps.
2. **For the evolution tubes:** Pour the contents of the culture tube into its metal cap, and then use sterile forceps to transfer the **black bead** to the new corresponding evolution tube with fresh media and a **white bead**.  
  
**For the control tube:** Briefly swirl the control tube culture, and then use the **p200** pipette to transfer 50  $\mu$ l of the culture to the new control tube.
3. Incubate the culture tubes on a rotating shaker at 28°C until your next class.

808  
809  
810  
811  
812  
813  
814  
815  
816  
817  
818  
819  
820  
821  
822  
823  
824  
825  
826  
827  
828  
829  
830  
831  
832  
833  
834  
835  
836  
837  
838  
839  
840  
841  
842  
843  
844  
845  
846  
847  
848  
849  
850  
851  
852

## DAY 5 (FRIDAY): FINAL PLATING

### NECESSARY MATERIALS:

- Metal forceps
- Vortex
- A p200 and p1000 pipette
- 4 Small glass tubes containing 1 mL Phosphate Buffered Saline (PBS)
- 8 Large glass culture tubes containing 5 mL Phosphate Buffered Saline (PBS)
- 4 Large glass culture tubes containing 4.5 mL Phosphate Buffered Saline (PBS)
- 8 ½ Strength Tsoy-Agar plates with glass beads

### PROCEDURE:

1. Flame sterilize and cool the forceps.
2. **For each evolution tube:** Pour the contents of the culture tube into its metal cap, and then use sterile forceps to transfer the **black bead** to the small glass tube with PBS. Vortex the small PBS tubes for at least 45 seconds to remove cells from the bead.

**For the control tube:** Briefly swirl the control tube culture, and then use a **p200** pipette to transfer 50  $\mu$  l of the culture to a small glass tube with PBS. Briefly vortex the small PBS tube.

### Perform the following steps for all evolution and control cultures:

3. Use a **p200** pipette to transfer 50  $\mu$  l from the small PBS tube to a 5mL PBS tube ( $10^{-2}$  dilution). Briefly vortex to mix.
4. Use a **p200** pipette to transfer 50  $\mu$  l from the  $10^{-2}$  tube to a new 5mL PBS tube ( $10^{-4}$  dilution). Briefly vortex to mix.
5. Use a **p1000** pipette to transfer 500  $\mu$  l of the  $10^{-4}$  tube to the 4.5mL PBS tube ( $10^{-5}$  dilution). Briefly vortex to mix.
6. Use a **p200** pipette to transfer 100  $\mu$  l of the  $10^{-4}$  and  $10^{-5}$  dilution tubes to agar plates
7. Shake the plates with their lids on top using the glass beads to spread the liquid culture. Remove the glass beads by turning the plates upside down and dumping the beads from the lid into the container provided.
8. Incubate the plates, **upside down**, at 28°C until your next class.

853  
854  
855  
856  
857  
858  
859  
860  
861  
862  
863  
864  
865  
866  
867  
868  
869

## DAY 6 (MONDAY): COLONY EXAMINATION

### NECESSARY MATERIALS:

- Dissecting microscope

### PROCEDURE:

Closely examine colony morphology:

- Do all colonies look exactly the same as those plated last Monday?
- If not, how many are different?
- Describe the following for each colony type:
  - Size – large, medium, or small
  - Texture – smooth or rough
  - Color
  - Shape

Use the following chart to help describe changes in colony appearance:

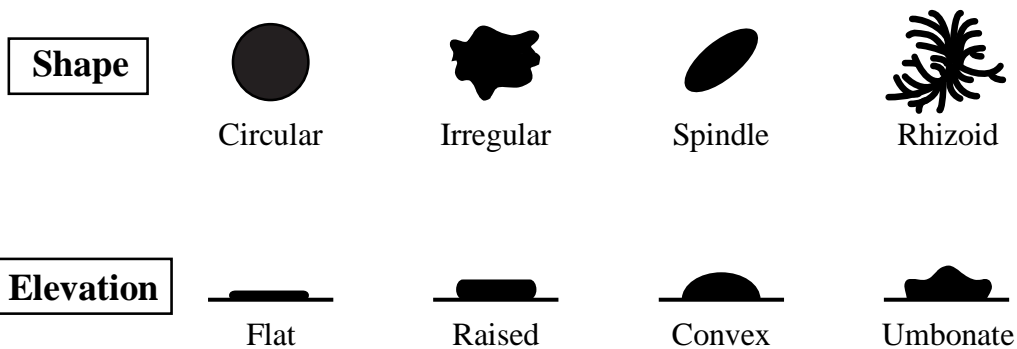

870  
871  
872

873  
874

# EvolvingSTEM Curriculum Overview

| Stage 1 Desired Results                                                                                                                                                                                                                                                                                                                                                                                    |                                                                                                                                                                                                                                                                                                                                                                                                                                                                                                                                                                                                                                                                                                                                                                                                                                                                                                                                                                                                                                                                          |
|------------------------------------------------------------------------------------------------------------------------------------------------------------------------------------------------------------------------------------------------------------------------------------------------------------------------------------------------------------------------------------------------------------|--------------------------------------------------------------------------------------------------------------------------------------------------------------------------------------------------------------------------------------------------------------------------------------------------------------------------------------------------------------------------------------------------------------------------------------------------------------------------------------------------------------------------------------------------------------------------------------------------------------------------------------------------------------------------------------------------------------------------------------------------------------------------------------------------------------------------------------------------------------------------------------------------------------------------------------------------------------------------------------------------------------------------------------------------------------------------|
| <p><b>ESTABLISHED GOALS</b></p> <p>The process of evolution drives the diversity and unity of life.</p> <ul style="list-style-type: none"> <li>• Big Idea 1 – AP Bio</li> <li>• HS-LS4 – NGSS</li> </ul>                                                                                                                                                                                                   | <b>Transfer</b>                                                                                                                                                                                                                                                                                                                                                                                                                                                                                                                                                                                                                                                                                                                                                                                                                                                                                                                                                                                                                                                          |
|                                                                                                                                                                                                                                                                                                                                                                                                            | <p><i>Students will be able to independently use their learning to complete a performance task at a Depth of Knowledge Level 3 and/or 4 (DOK 3 &amp; DOK 4)</i></p> <p>Depth of Knowledge Level 3 (Strategic Thinking)</p> <ul style="list-style-type: none"> <li>• Justify a response when more than one answer is possible</li> <li>• Cite evidence and develop a logical argument for concepts</li> <li>• Design and conduct an investigation</li> <li>• Research and explain a scientific concept</li> </ul> <p>Depth of Knowledge Level 4 (Extended Thinking)</p> <ul style="list-style-type: none"> <li>• Based on provided data from a complex experiment that is novel to the student, deduct the fundamental relationship between several controlled variables</li> <li>• Conduct an investigation, from specifying a problem to designing and carrying out an experiment, to analyzing its data and forming conclusions</li> <li>• Develop generalizations of the results obtained and the strategies used and apply them to new problem situations</li> </ul> |
|                                                                                                                                                                                                                                                                                                                                                                                                            | <b>Meaning</b>                                                                                                                                                                                                                                                                                                                                                                                                                                                                                                                                                                                                                                                                                                                                                                                                                                                                                                                                                                                                                                                           |
| <p><b>UNDERSTANDINGS</b><br/><i>Students will understand that...</i></p> <ul style="list-style-type: none"> <li>• Change in the genetic makeup of a population over time is evolution.</li> <li>• Organisms are linked by lines of descent from common ancestry.</li> <li>• Life continues to evolve within a changing environment.</li> </ul> <p>(Enduring Understandings 1.A, 1.B, 1.C – AP Biology)</p> | <p><b>ESSENTIAL QUESTIONS</b></p> <ol style="list-style-type: none"> <li>1. What is evolution?</li> <li>2. Do humans influence evolution?</li> <li>3. What is natural selection?</li> <li>4. How does natural selection lead to adaptation of populations?</li> <li>5. How can microbiology be used to understand the mechanisms of adaptation and evolution?</li> <li>6. What is the difference between adaptation and evolution?</li> </ol>                                                                                                                                                                                                                                                                                                                                                                                                                                                                                                                                                                                                                            |
| <b>Acquisition</b>                                                                                                                                                                                                                                                                                                                                                                                         |                                                                                                                                                                                                                                                                                                                                                                                                                                                                                                                                                                                                                                                                                                                                                                                                                                                                                                                                                                                                                                                                          |



|  |                                                                                                                                                                                                                                                                                                                                                                                                                                                                                                                                                                                                                                                                                                                                                                                                                                                                                                                                                                                                                                                                                                              |                                                                                                                                                                                                                                                                                                                                                                                                                                                                                                                                                                                                                                                                                                                                                                                                                                                                                                                                                                                                                                                                                                                                   |
|--|--------------------------------------------------------------------------------------------------------------------------------------------------------------------------------------------------------------------------------------------------------------------------------------------------------------------------------------------------------------------------------------------------------------------------------------------------------------------------------------------------------------------------------------------------------------------------------------------------------------------------------------------------------------------------------------------------------------------------------------------------------------------------------------------------------------------------------------------------------------------------------------------------------------------------------------------------------------------------------------------------------------------------------------------------------------------------------------------------------------|-----------------------------------------------------------------------------------------------------------------------------------------------------------------------------------------------------------------------------------------------------------------------------------------------------------------------------------------------------------------------------------------------------------------------------------------------------------------------------------------------------------------------------------------------------------------------------------------------------------------------------------------------------------------------------------------------------------------------------------------------------------------------------------------------------------------------------------------------------------------------------------------------------------------------------------------------------------------------------------------------------------------------------------------------------------------------------------------------------------------------------------|
|  | <p><i>Students will know...</i></p> <ul style="list-style-type: none"><li>• Competition for limited resources results in differential survival. Individual with more favorable phenotypes are more likely to survive and reproduce more offspring, thus passing traits to subsequent generations.</li><li>• Evolutionary fitness is measured by reproductive success.</li><li>• Genetic variation and mutation play roles in natural selection.</li><li>• An adaptation is a genetic variation that is favored by selection and is manifested as a trait that provides an advantage to an organism in a particular environment.</li><li>• In addition to natural selection, chance and random events can influence the evolutionary process, especially for small populations.</li><li>• Humans impact variation in other species.</li><li>• Biochemical and genetic similarities, in particular DNA nucleotide and protein sequences, provide evidence for evolution and ancestry.</li><li>• DNA and RNA are carriers of genetic information through transcription, translation, and replication.</li></ul> | <p><i>Students will be skilled at...</i></p> <ul style="list-style-type: none"><li>• Developing experimental designs that can be used to test specific hypotheses.</li><li>• Evaluating evidence provided by data to qualitatively and quantitatively investigate the role of natural selection in evolution.</li><li>• Constructing evidence-based explanations that the process of evolution results from four primary factors.</li><li>• Applying basic math calculations related to experiments.</li></ul> <p>Science and Engineering Practices</p> <ul style="list-style-type: none"><li>• Analyzing and interpreting data</li><li>• Using mathematics and computational thinking</li><li>• Constructing explanations and designing solutions</li><li>• Engaging in argument from evidence</li><li>• Obtaining, evaluating, and communicating information</li></ul> <p>Crosscutting Concepts</p> <ul style="list-style-type: none"><li>• Observing different patterns at each of the scales at which a system is studied.</li><li>• Utilizing empirical evidence to make claims about specific causes and effects.</li></ul> |
|--|--------------------------------------------------------------------------------------------------------------------------------------------------------------------------------------------------------------------------------------------------------------------------------------------------------------------------------------------------------------------------------------------------------------------------------------------------------------------------------------------------------------------------------------------------------------------------------------------------------------------------------------------------------------------------------------------------------------------------------------------------------------------------------------------------------------------------------------------------------------------------------------------------------------------------------------------------------------------------------------------------------------------------------------------------------------------------------------------------------------|-----------------------------------------------------------------------------------------------------------------------------------------------------------------------------------------------------------------------------------------------------------------------------------------------------------------------------------------------------------------------------------------------------------------------------------------------------------------------------------------------------------------------------------------------------------------------------------------------------------------------------------------------------------------------------------------------------------------------------------------------------------------------------------------------------------------------------------------------------------------------------------------------------------------------------------------------------------------------------------------------------------------------------------------------------------------------------------------------------------------------------------|

|  |                                                                                                                                                                                                                                                            |  |
|--|------------------------------------------------------------------------------------------------------------------------------------------------------------------------------------------------------------------------------------------------------------|--|
|  | <p>Connections to Nature of Science</p> <ul style="list-style-type: none"> <li>• Scientific knowledge assumes an order and consistency in natural systems.</li> <li>• Science models, laws, mechanisms, and theories explain natural phenomena.</li> </ul> |  |
|--|------------------------------------------------------------------------------------------------------------------------------------------------------------------------------------------------------------------------------------------------------------|--|

875

876

| <b>Stage 2 – Evidence</b>                                                                                                                                                                                                                                                                                                                      |                                                                                                                                                                                                                                                                                                                                                                                                                                                                                                                                                                                                                                                                       |
|------------------------------------------------------------------------------------------------------------------------------------------------------------------------------------------------------------------------------------------------------------------------------------------------------------------------------------------------|-----------------------------------------------------------------------------------------------------------------------------------------------------------------------------------------------------------------------------------------------------------------------------------------------------------------------------------------------------------------------------------------------------------------------------------------------------------------------------------------------------------------------------------------------------------------------------------------------------------------------------------------------------------------------|
| <b>Evaluative Criteria</b>                                                                                                                                                                                                                                                                                                                     | <b>Assessment Evidence</b>                                                                                                                                                                                                                                                                                                                                                                                                                                                                                                                                                                                                                                            |
| <p>Project Rubric<br/>Peer evaluation<br/>Self-evaluation<br/>Presentation with rubric</p> <ul style="list-style-type: none"> <li>• science showcase</li> <li>• school board meeting</li> <li>• conference</li> <li>• step up day</li> <li>• vertical team meeting</li> <li>• middle schools/other high schools</li> <li>• in class</li> </ul> | <p>PERFORMANCE TASK(S):</p> <ol style="list-style-type: none"> <li>1. Given specific experimental conditions, predict the outcome of bacterial growth supported by existing research. (2-3 days).</li> <li>2. Student-designed projects to change experimental conditions such as: <ul style="list-style-type: none"> <li>• Intermediate levels of disturbance – shaking, non-shaking, mix between shaking and non-shaking.</li> <li>• Altering nutrient levels</li> <li>• Oxygen availability</li> <li>• Balance between oxygen and nutrients – short and fat or long and thin microcosms</li> <li>• Changing incubation conditions (2 weeks)</li> </ul> </li> </ol> |
| <p>Journal grade with rubric<br/>Daily participation grade (5 point/day)<br/>Numerical test and quiz grades<br/>Teacher and peer feedback<br/>Self-reflection</p>                                                                                                                                                                              | <p>OTHER EVIDENCE:</p> <ol style="list-style-type: none"> <li>1. Lab Journal – daily entries</li> <li>2. Class Starter and Exit Ticket questions – review previous day, lab protocol or technique, address misconceptions, standardized test release questions</li> <li>3. Lab participation – daily grade</li> <li>4. Probes as formative assessment to address misconceptions, identify areas of reteaching, and document student growth.</li> <li>5. Quizzes and tests - document learning of content knowledge and lab skills</li> </ol>                                                                                                                          |

877

878

**Stage 3 – Learning Plan**

## Summary of Key Learning Events and Instruction

### Learning Activities

A brief summary of the key learning activities is provided below.

#### Prior to starting EvolvingSTEM (optional)

- Meet *Pseudomonas fluorescens* – read a bio on *P. fluorescens*, brainstorm as a group the similarities and differences between *P. flu* and humans; introduce that common ancestry and biological evolution are supported by multiple lines of empirical evidence
- Complete geologic timeline to introduce deep time
- Introduce lab techniques – swab the world, pipetting competitions, Bunsen burner lighting and safety (Videos available – online or DVD)
- Journal articles – biofilm, CF connection, *P. fluorescens* background

#### During EvolvingSTEM Experiment

- Refer to daily calendar for planning/scope and sequence.
- Provide each student with a color-coded Evolution in Action protocol with daily procedures and questions for lab journal.
- Post and discuss essential questions and understanding.
- Use lab and content-based videos (online or DVD) with questions to maximize class time in the lab. Videos can be used in a flipped classroom model, in class model, or a blend of both.
- Introduce class starter and exit ticket questions/probes to assess student learning, address misconceptions, and review material.
- Review probes and lead discussions as necessary to address and correct misconceptions.
- Schedule “Ask The Expert” with Dr. Cooper (Skype) to introduce research, CF connection, field student questions.
- Use standard assessments (quiz/test) to gauge student learning as they progress through the unit. (formative and summative)
- Assign scientific journals and readings on evolution (Common Core Literacy Standard). Lead small and/or large group discussions, fish bowl, whiteboard report out.
- Introduce Performance Task. Discuss rubric and timeline.
- Engage students in peer and self-evaluation.
- Organize student showcase to display and discuss work.

#### Optional Extensions

1. Students will review scientific literature that describes the mutations associated with given phenotypes. Genomic sequencing of these phenotypes will allow them to make connections between the literature and their findings (Common Core Literacy Standard).
2. Research project/Webquest – Explore similarities and differences of two or more genomes (NCBI, BLAST, NIH) to begin to understand common ancestry
3. Explore STEM-related fields of study and careers in such areas as microbiology, physiology, engineering, medicine, and public health
4. Cystic Fibrosis – [www.cff.org](http://www.cff.org), CF walk participation, school team - fundraising, research, Webquest, Cooper Lab visit

5. SEM images of ancestral and mutant colonies – micrometer measurements, observations, compare and contrast
6. Exploration and discussion of antibiotic resistance
7. Fitness assays and sequencing
8. Connections to other units – Genetics, Classification, Nature of Science (Inquiry), Cells, Characteristics of Life

879

### **PRE-LAB QUESTIONS: DAY 1**

880

881

882

883

884

885

886

887

888

889

890

891

892

893

### **POST-LAB QUESTIONS: DAY 1**

894

895

896

897

898

899

900

901

902

903

904

905

906

907

1. In one sentence briefly describe the purpose of the “pre-conditioning” step that will be carried out on Day 1 of your experiment? How many colonies are used to inoculate one test tube containing media and a white bead?
2. Suzie has just used a sterilized inoculating loop to obtain a single isolated colony of bacteria, which she then transferred into her test tube containing fresh media and a white bead. After she has put the cap of her newly inoculated test tube back on, she grabs the petri dish and goes to grab another colony. Before she can touch the inoculating loop to the petri dish, Larry stops her and tells her that she is doing it wrong. Which student is correct in this case, and why?

1. What is another name of an error that is introduced during the process of replication that results in a new DNA sequence? What is the end product of this newly formed DNA sequence in comparison to the original DNA sequence?
2. What are the two possible forces that can act on mutations that occur in DNA sequences? Describe in detail the difference between these two different forces.
3. Describe the characteristics of bacteria that make them advantageous when studying evolution?
4. Summarize the different stages that occur throughout the biofilm lifecycle. How does this relate to the bead transfer model that is used in the experiments?

908  
909  
910  
911  
912  
913  
914  
915  
916  
917  
918  
919  
920  
921  
922  
923  
924  
925  
926  
927  
928  
929  
930  
931  
932  
933  
934  
935  
936  
937  
938  
939  
940  
941

### PRE-LAB QUESTIONS: DAY 2

1. In one sentence briefly summarize the process of serial dilutions. What is happening to the overall population size of the bacteria as you carry out these dilutions and what is achieved by completing them?
2. Draw the series of steps that are required to complete a serial dilution on Day 2. Include the amount of liquid that is being transferred, the amount of liquid that is in the dilution tube, and the dilution that is achieved with each step. Circle the dilution(s) that will be plated on Day 2.
3. In one sentence briefly summarize the process of plating a bacterial culture. What is achieved by plating, and why is it incredibly important to ensure that you are plating on the agar side of the plate?
4. Once the bead has been transferred from the large glass evolution tube to the small glass tube containing 1 mL of Queen's B media, how long should the small glass tube be vortexed for? What is the purpose of vortexing?
5. In general, the large media tubes will contain 5 mL of media; however, on Day 2 the large glass evolution tube only contains 4.5 mL of media. Can you explain why this is the case?

### POST-LAB QUESTIONS: DAY 2

1. Why is it important to transfer the bacteria every 24 hours? Draw a graph that illustrates the growth of a bacterial culture. Make sure to label your axes!
2. Provide a detailed hypothesis that describes what you think might occur in your test tube over the next 24 hours when your bacteria from inside the test tube are adhering to the new bead. Try to use the following vocabulary in your predictions: planktonic, biofilm, and overproduction and polystyrene bead.

942  
943  
944  
945  
946  
947  
948  
949  
950  
951  
952  
953  
954  
955  
956  
957  
958  
959  
960  
961  
962  
963  
964  
965  
966  
967  
968  
969  
970  
971  
972

### **PRE-LAB QUESTIONS: DAY 3**

1. What is the color of the old bead that is being transferred from the 24-hour large glass evolution tube? What is the color of the new bead that is in the new large glass evolution tube?
2. Why is it important to disrupt the bead as little as possible during your daily bead transfer?
3. Describe what your test tube looked like on Day 2 when you put it in the incubator following your transfer. What do you think it will look like on Day 3 when you remove it from the incubator? Describe the amount of biofilm that is seen on the sides of the tube, the type of biofilm that is seen, and the color of the liquid media.

### **POST-LAB QUESTIONS: DAY 3**

1. Describe in detail the three different types of mutations that can occur and the possible effect of that given type of mutation. Which two types of mutations are generally more common, and which is the least likely to occur?
2. What is being accomplished by transferring only the bacteria that have successfully attached to the bead? What is this type of selection called?
3. Provide a detailed hypothesis that describes what you believe might occur in your test tube over the next 24 hours when your bacteria are detaching from the old bead and adhering to the new bead. Use the following vocabulary in your predictions: overproduction, planktonic, biofilm, exponential, polystyrene bead, and mutation (both beneficial and neutral).

973  
974  
975  
976  
977  
978  
979  
980  
981  
982  
983  
984  
985  
986  
987  
988  
989  
990  
991  
992  
993  
994  
995  
996  
997  
998  
999  
1000  
1001  
1002  
1003  
1004  
1005  
1006  
1007  
1008  
1009  
1010

### PRE-LAB QUESTIONS: DAY 4

1. What is the color of the old bead that is being transferred from the 24-hour large glass evolution tube?
2. Describe what your test tube looked like when you put it in the incubator following your transfer on Day 3. What do you think it will look like on Day 4 when you remove it from the incubator? Describe the amount of biofilm that is seen on the sides of the tube, the type of biofilm that is seen, and the color of the liquid media.

### POST-LAB QUESTIONS: DAY 4

1. It is possible that when you removed your tubes today, only one of them has significantly more biofilm on the sides of the tubes and has a neon culture. As we discussed, this is a possible indication that you have a beneficial mutation in your population. Can you provide an explanation for why only one of your four replicates looks like this if you started with identical bacteria at the beginning of your experiment?
2. If we were to impose a greater force of artificial selection on the bacteria that we are studying, would it increase the number of mutations that we see in our experiment? Why or why not?
3. We already know that bacteria grow at an incredibly fast rate and can potentially overproduce, causing them to produce more bacteria inside the test tube than can survive. This over production leads to another phenomenon, which is another point of Darwin's Theory of Evolution by Natural Selection. Explain how this is occurring inside of the test tube and how it relates to overproduction.
4. Provide a detailed hypothesis that describes what you believe might occur in your test tube over the next 24 hours when your bacteria are detaching from the old bead and adhering to the new bead. Use the following vocabulary in your predictions: overproduction, planktonic, biofilm, exponential, competition, mutation (both beneficial and neutral), resources, space, polystyrene bead, nutrients, frequency, niche, and heritable genetic variation.

1011  
1012  
1013  
1014  
1015  
1016  
1017  
1018  
1019  
1020  
1021  
1022  
1023  
1024  
1025  
1026  
1027  
1028  
1029  
1030  
1031  
1032  
1033  
1034  
1035  
1036  
1037  
1038  
1039  
1040  
1041  
1042  
1043  
1044  
1045  
1046  
1047  
1048

### PRE-LAB QUESTIONS: DAY 5

1. What is the color of the bead that is going to be plated? Why isn't it necessary to transfer the other bead to a new evolution tube containing fresh media and an oppositely marked bead?
2. Draw the series of steps that are required to complete a serial dilution on Day 5. Include the amount of liquid that is being transferred, the amount of liquid that is in the dilution tube, and the dilution that is achieved with each step. Circle the dilution(s) that will be plated on Day 5.
3. Provide a detailed hypothesis as to why you believe it is necessary to dilute one step further on Day 5 than on Day 2.
4. Describe what your test tube looked like when you put it in the incubator following your transfer on Day 4. What do you think it will look like on Day 5 when you remove it from the incubator? Describe the amount of biofilm that is seen on the sides of the tube, the type of biofilm that is seen, and the color of the liquid media.

### POST-LAB QUESTIONS: DAY 5

1. Did one of your tubes change drastically from Day 4? If you observed a change in one of your tubes, explain the differences that you are seeing. In addition, provide possible explanations as to why you have yet to see a change in your other replicates.
2. Discuss how mutations increase in frequency over time. You may draw a graph below to illustrate this process.
3. When you removed your tube from the incubator on Day 2, it had not appeared to change greatly from when you started your experiment. When you removed your tube from the incubator on Day 5, the culture was neon yellow. You are sure that when you plate today, you will definitely have mutants on your plate. Your group member also states that it is possible that you have mutants on your Day 2 plates. Is he/she correct? Discuss the potential results that may be observed.



1049  
1050  
1051  
1052  
1053  
1054  
1055  
1056  
1057  
1058  
1059  
1060  
1061  
1062  
1063  
1064  
1065  
1066  
1067  
1068  
1069  
1070  
1071  
1072  
1073  
1074  
1075  
1076  
1077

### **PRE-LAB QUESTIONS: DAY 6**

1. Predict what your Day 5 colonies will look like when you view them in the lab. How will they look different from the colonies you plated on Day 2?
2. As we discussed previously, it is possible that you may see multiple phenotypes on your agar plate during the course of your evolutions. Provide a hypothesis that might explain the role that each of these mutants is playing in the community.

### **POST-LAB QUESTIONS: DAY 6**

1. Explain how two mutants with distinct phenotypes can inhabit the same test tube simultaneously. Be sure to incorporate the importance of an ecological niche in your answer.
1. Now that you have completed your evolution experiment, do you believe that evolution is fast or slow? Provide an explanation to support your answer.
2. You now have all four pieces that are required to support Darwin's Theory of Evolution by Natural Selection. Use all four to comprise an explanation that can support our example of microevolution that occurred in our test tube over the past week. Do you think that these same four points can be applied to a macro-evolutionary example?
3. Explain the difference between evolution and adaptation.

## STUDENT TEST

1078  
1079  
1080  
1081  
1082  
1083  
1084  
1085  
1086  
1087  
1088  
1089  
1090  
1091  
1092  
1093  
1094  
1095  
1096  
1097  
1098  
1099  
1100  
1101  
1102  
1103  
1104  
1105  
1106  
1107  
1108  
1109  
1110  
1111  
1112  
1113  
1114  
1115  
1116  
1117  
1118  
1119  
1120  
1121  
1122  
1123

Student ID Number: \_\_\_\_\_

Block Number: \_\_\_\_\_

Teacher: \_\_\_\_\_

Date: \_\_\_\_\_

(Understanding)

From the groups of characteristics below, identify the best answer for describing evolution. (2 pts. each)

1. Rate of evolution:
  - a. Evolution does not happen, the rate of change in species is zero
  - b. Fast – taking place in just a few generations
  - c. Slow – taking thousands of generations or many thousands of years
  - d. Evolution can be either Fast or Slow
2. The fundamental source of genetic variation among individual organisms is:
  - a. Levels of nutrition that individuals receive
  - b. Random mutations in DNA sequences or chromosomes
  - c. Physical changes accumulated during an organism's lifetime
  - d. Unexpected changes occurring during embryonic development
3. Amount of change in evolution:
  - a. Evolution occurs rapidly, with quick appearance of new traits
  - b. Evolution occurs at rates ranging from gradual to rapid
  - c. Evolution occurs gradually by the accumulation of small changes over time
  - d. Evolution does not happen so the amount of change is zero
4. Types of organisms that evolve:
  - a. Evolution does not happen in any type of organism
  - b. Evolution occurs in tiny organisms like bacteria and other single-celled species
  - c. Evolution occurs in large organisms like palm trees, crabs, snakes, and giraffes
  - d. Evolution occurs in all groups of organisms
5. Which example statement best describes evolutionary change?
  - a. There are no observable changes in organisms over time
  - b. A cat fed on a good diet grows larger than a cat fed on a poor diet
  - c. A fair-skinned person tans during a summer
  - d. Plants growing on a wet, lush island grow higher than plants on a dry, desert island
  - e. The bill shape of birds changes because the hardness of the seeds they eat changes
6. For evolution to occur, which genetic characteristic must be present?
  - a. There must be an even number of chromosomes
  - b. Individual organisms in a population must appear different
  - c. The differences in organisms must be capable to be passed to offspring
  - d. All of the characteristics listed above must be present

(Apply)

1124  
1125

7. The New Mexico Whiptail (*Cnemidophorus neomexicanus*) is a parthenogenic lizard species from New Mexico and Arizona. The population consists entirely of

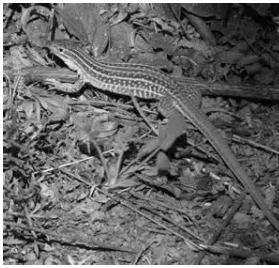

1126 females capable of laying viable eggs without fertilization. Many years ago, after receiving the necessary collecting permits, your teacher collected a single (1) New Mexico Whiptail and brought it to your school laboratory in NH. Your school laboratory is well-resourced with aquaria and mealworms, and everything needed to rear healthy whiptails. The first clutch yielded 10 offspring from the original whiptail and they were divided into two equal

1134  
1135  
1136  
1137  
1138  
1139  
1140  
1141  
1142

groups (A and B). Individuals in group A were marked by clipping the tip of the last digit on the left hind toe, and group B by the same procedure on the right hind toe. Note that the toe clipping has no effect on the ability of the lizard to survive in the environment, and was only used as a way to distinguish the two groups. Your teacher has been observing the mothers of the egg clutches, and as young whiptails hatch you clip the appropriate toe to assign them to the proper group of their mother. After 500 generations of living together with hatches and deaths occurring, the population size has grown to 340 whiptails with 272 in Group A, and 68 in Group B.

1143  
1144  
1145  
1146

Count of Group A and B individual New Mexico Whiptails (*Cnemidophorus neomexicanus*) in the first generation (1) and in generation (500). Count does not include dead individuals, which were removed.

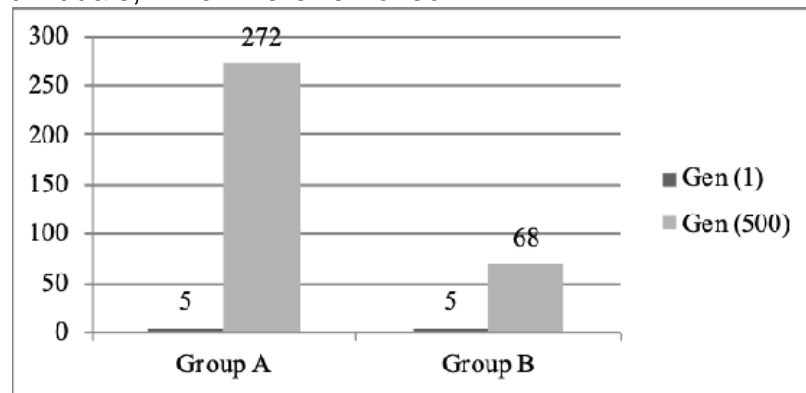

1147  
1148  
1149  
1150  
1151  
1152  
1153  
1154  
1155  
1156  
1157  
1158  
1159

- a. What is the percentage of Group A and Group B in the first generation of Whiptails? (2 points)
- b. What is the percentage of Group A and Group B in the total population after 500 generations of hatches and deaths? (2 points)
- c. Provide a possible evolutionary explanation for the shift in numbers of Group A and Group B individuals. (6 points)

---

---

1160 \_\_\_\_\_  
1161 \_\_\_\_\_  
1162 \_\_\_\_\_  
1163 \_\_\_\_\_  
1164 \_\_\_\_\_  
1165 \_\_\_\_\_  
1166 \_\_\_\_\_  
1167 \_\_\_\_\_  
1168 \_\_\_\_\_  
1169 \_\_\_\_\_  
1170 \_\_\_\_\_

1171 8. List and briefly describe the 4 key elements that produce evolutionary change (12  
1172 points, 1.5 points for each correct concept, and 1.5 points for each correct  
1173 description).

- 1174 1.  
1175  
1176 2.  
1177  
1178 3.  
1179  
1180 4.

1181  
1182  
1183 (Analyze)

1184 9. You and your lab partner are given a test tube with a single living type of  
1185 bacterium that grows in the water at room temperature. When you grow the  
1186 organism in a petri dish, the bacterium only grows in circular- shaped colonies  
1187 with clean, smooth edges. Then you grow your bacterium in the water but in a  
1188 refrigerator. When you grow the organism from the refrigerator in a petri dish,  
1189 you find circular-shaped colonies with clean, smooth edges, but also colonies  
1190 with irregular-shapes and rough, jagged edges. You and your lab partner repeat  
1191 this procedure, each time beginning with only the original bacterium. Each time  
1192 you get the same result. Your lab partner exclaims, "The bacterium evolved!!" Is  
1193 your lab partner correct? Why or why not? (16 points)

1194

1195

**Pre- and Post-Test Grading Rubric**

|                   | EXCEEDS<br>4                                                                                                                                                                                                                                                                                                              | MEETS<br>3                                                                                                                                                      | APPROACHES<br>2                                                                                                                  | BEGINS<br>1                                                                   | STRUGGLES<br>0                                                        |
|-------------------|---------------------------------------------------------------------------------------------------------------------------------------------------------------------------------------------------------------------------------------------------------------------------------------------------------------------------|-----------------------------------------------------------------------------------------------------------------------------------------------------------------|----------------------------------------------------------------------------------------------------------------------------------|-------------------------------------------------------------------------------|-----------------------------------------------------------------------|
| Content Knowledge | Information on the topic is accurate. It addresses and extends beyond the questions raised in the prompt. Student incorporates outside examples that strongly help them defend their claims. Important vocabulary is used properly in the context of the response. It synthesizes competing ideas and says something new. | Information on the topic is accurate. It addresses the questions raised in the prompt. Important vocabulary is used, but not necessarily in the proper context. | Information on the topic is accurate, but does not address all questions raised in the prompt. Important vocabulary is not used. | Information on the topic is inaccurate or sparse. The response reports facts. | No response is supplied or the information on the topic is incorrect. |

1196

1197

1198
